# Supplementary figures and images for: RETRACTED ARTICLE: miR-195-5p/NOTCH2-mediated EMT modulates IL-4 secretion in colorectal cancer to affect M2-like TAM polarization
Source: Springer Nature journal article supplement (doi:10.1186/s13045-019-0708-7), 2019-02-26

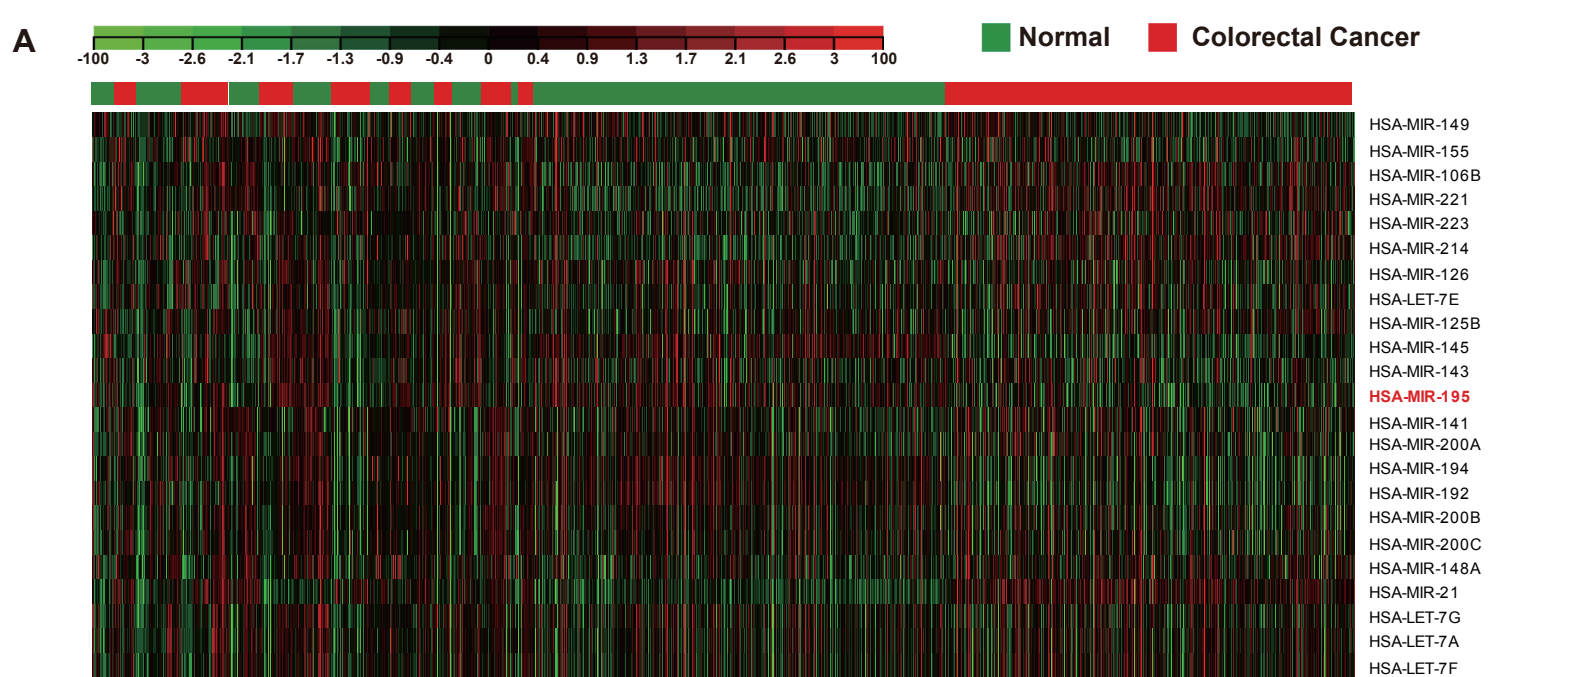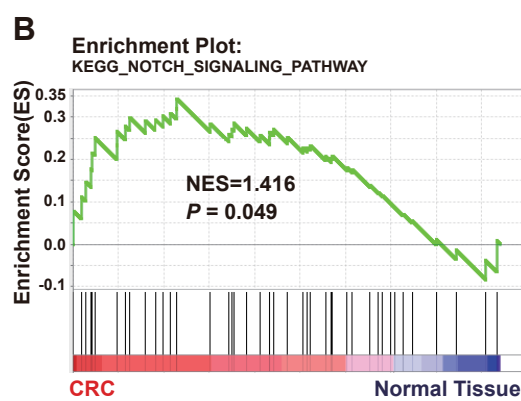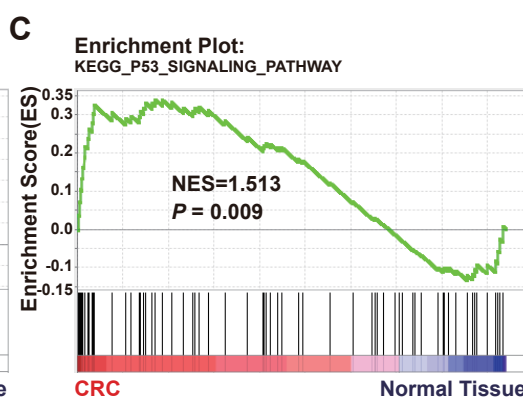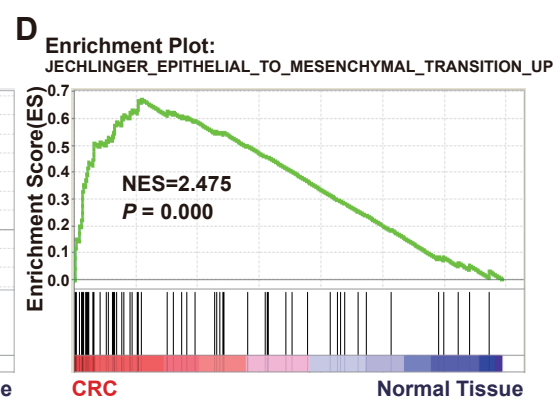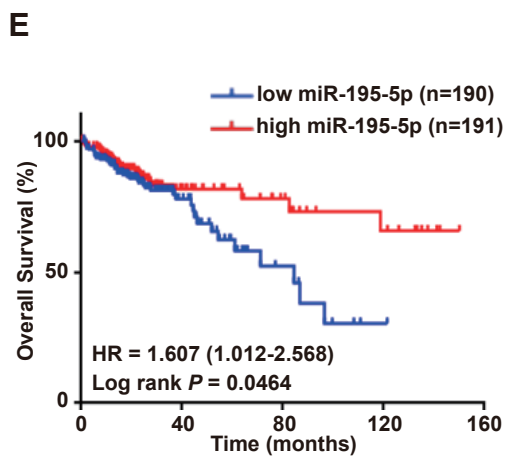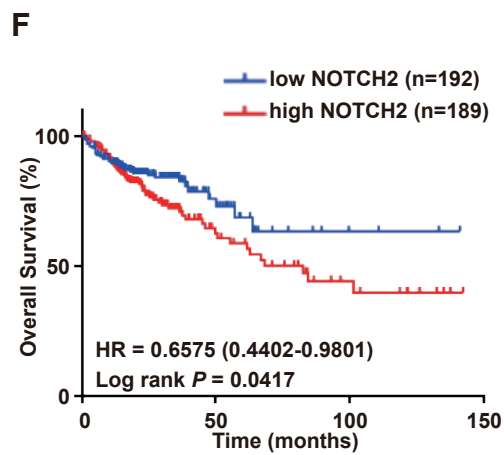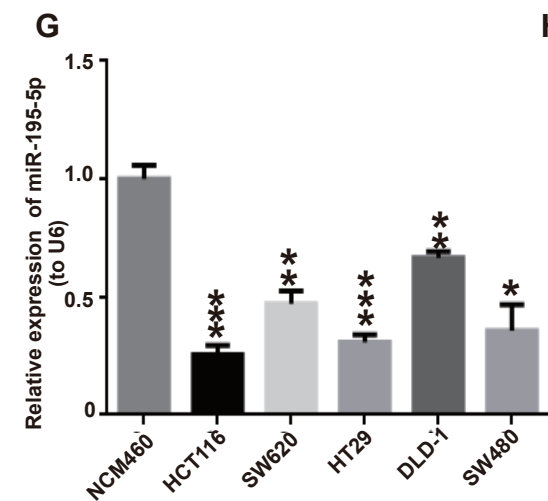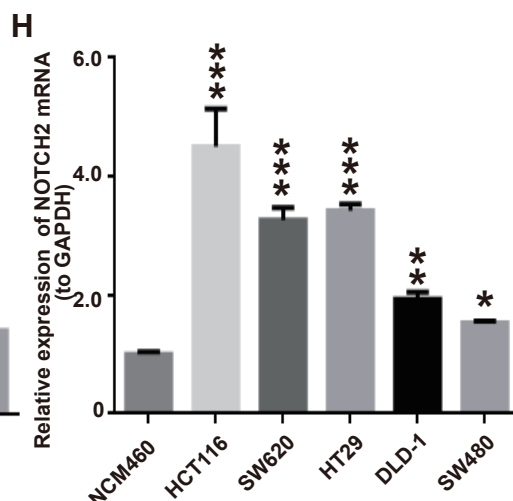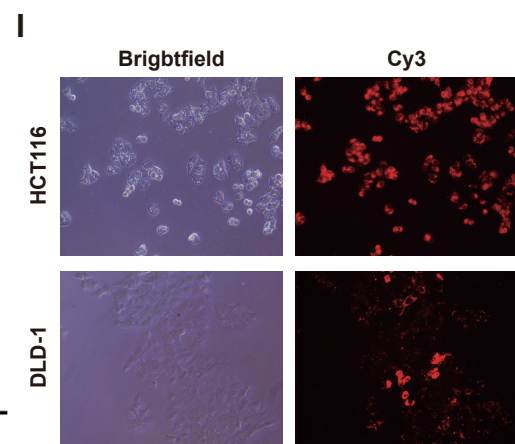

Supplement: MOESM3 [file 16510116]

**A**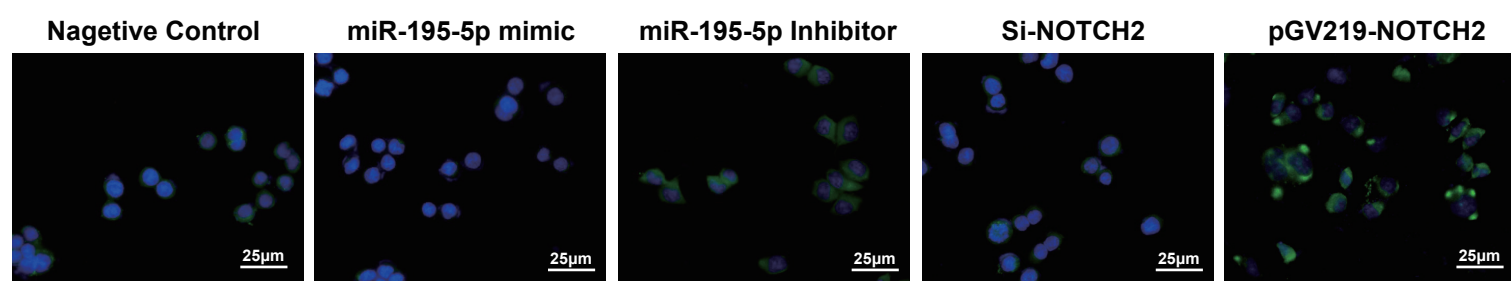**B**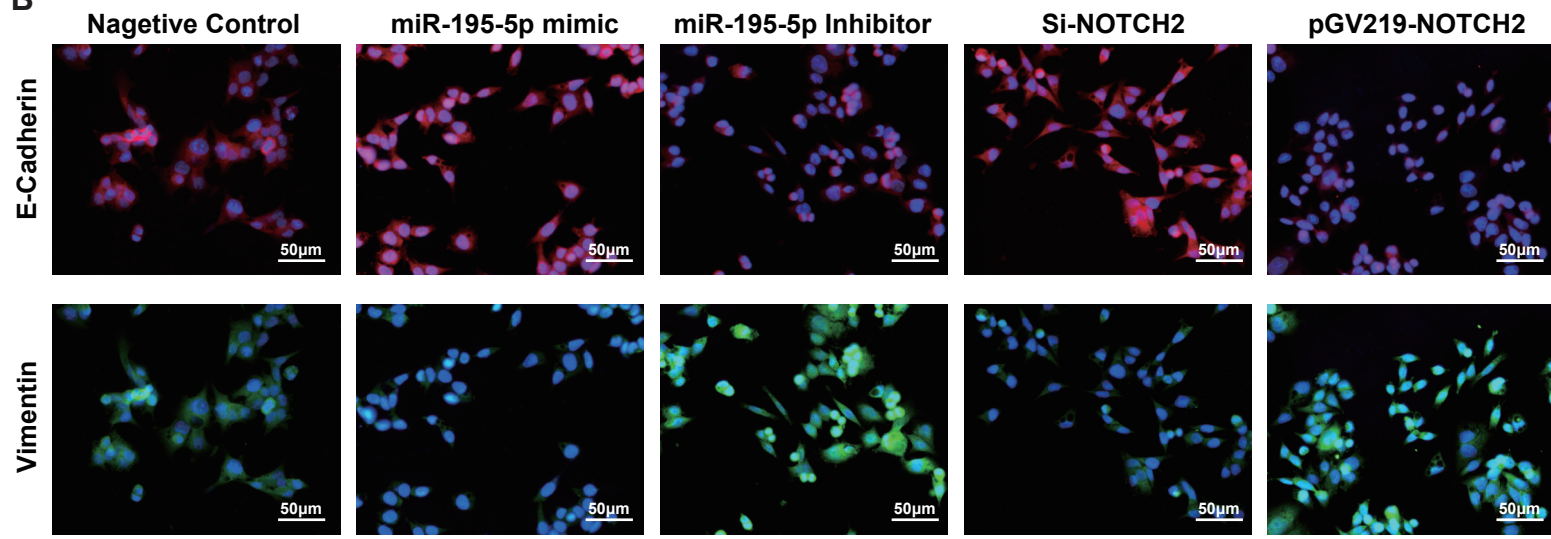

Supplement: MOESM4 [file 16510116]

**A**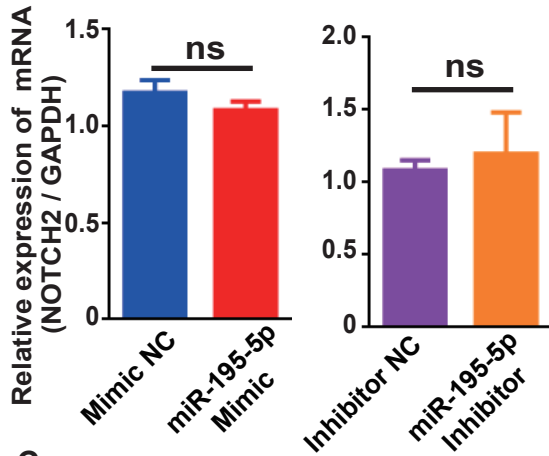**B**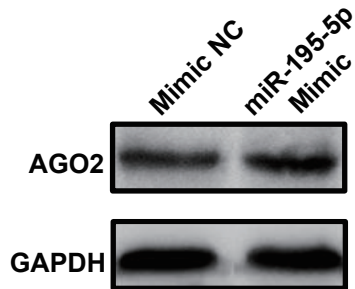**C**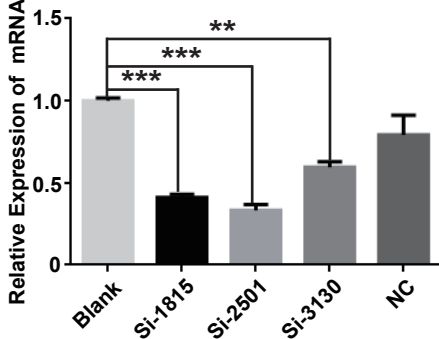**D**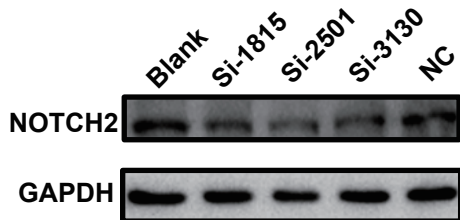**E**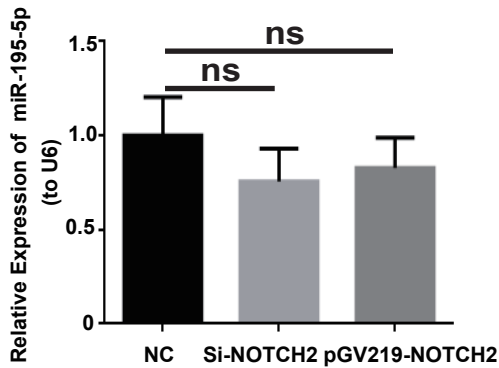**F**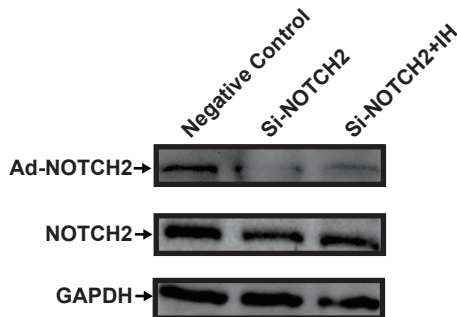

Supplement: MOESM5 [file 16510116]

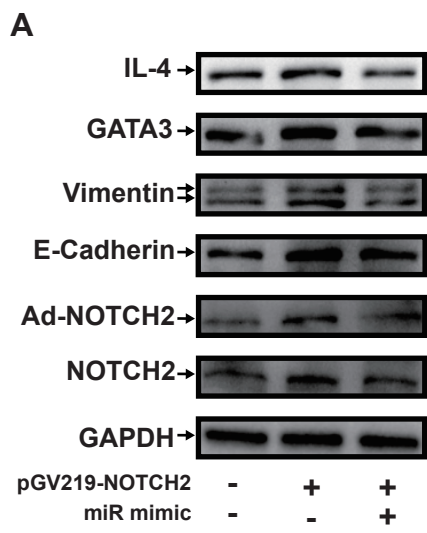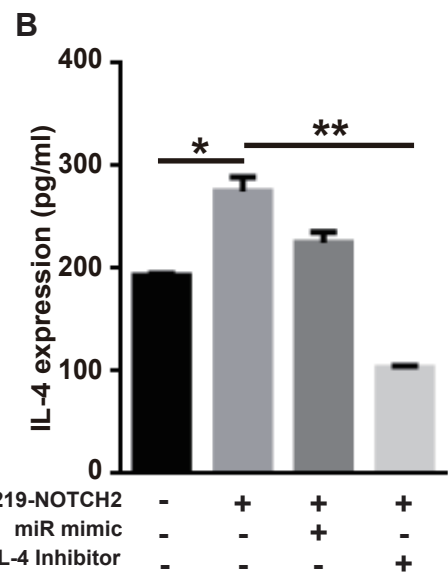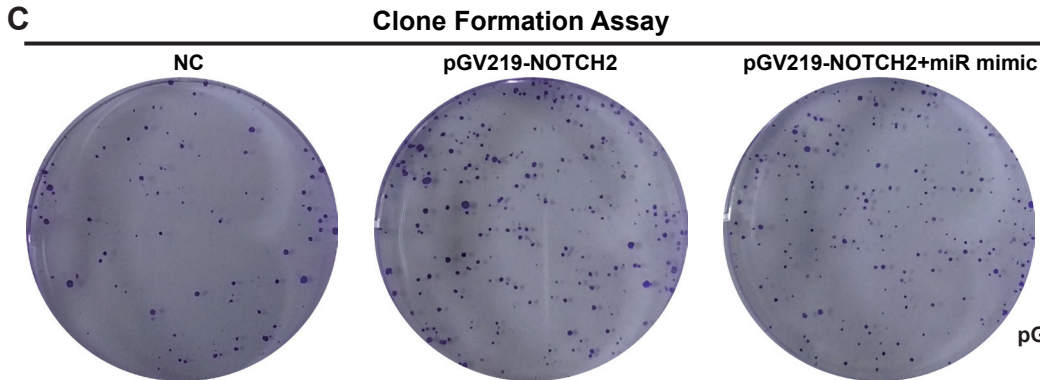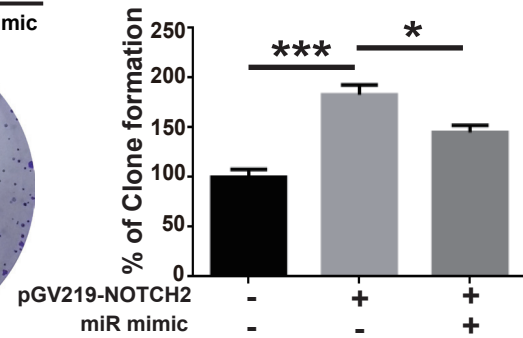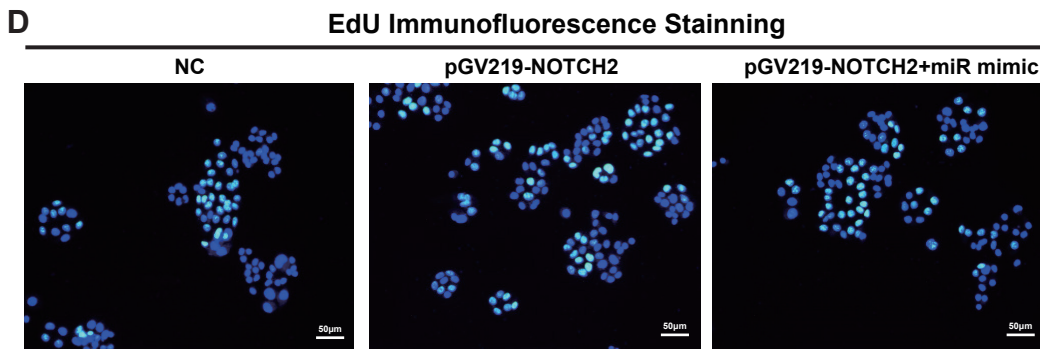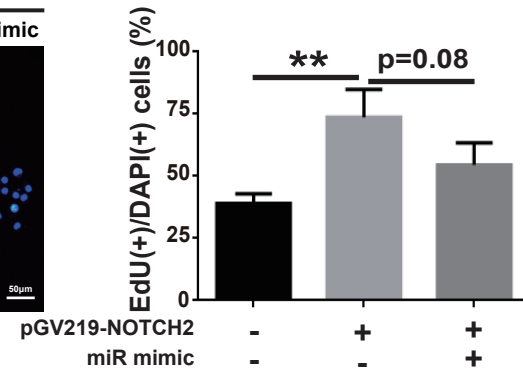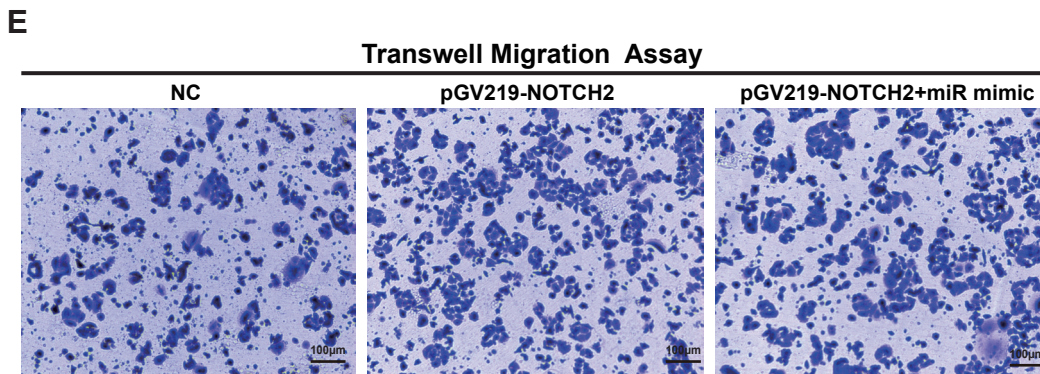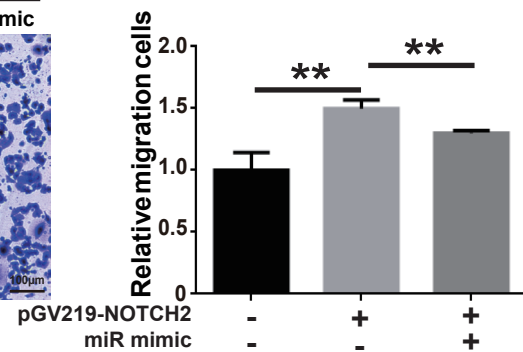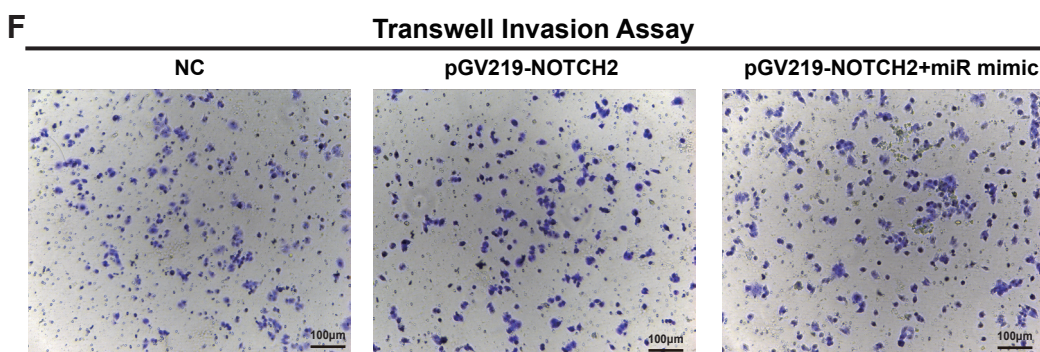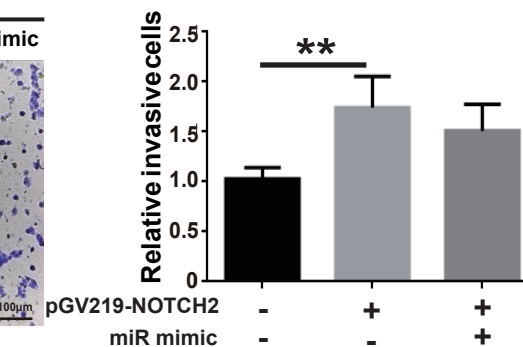

Supplement: MOESM6 [file 16510116]

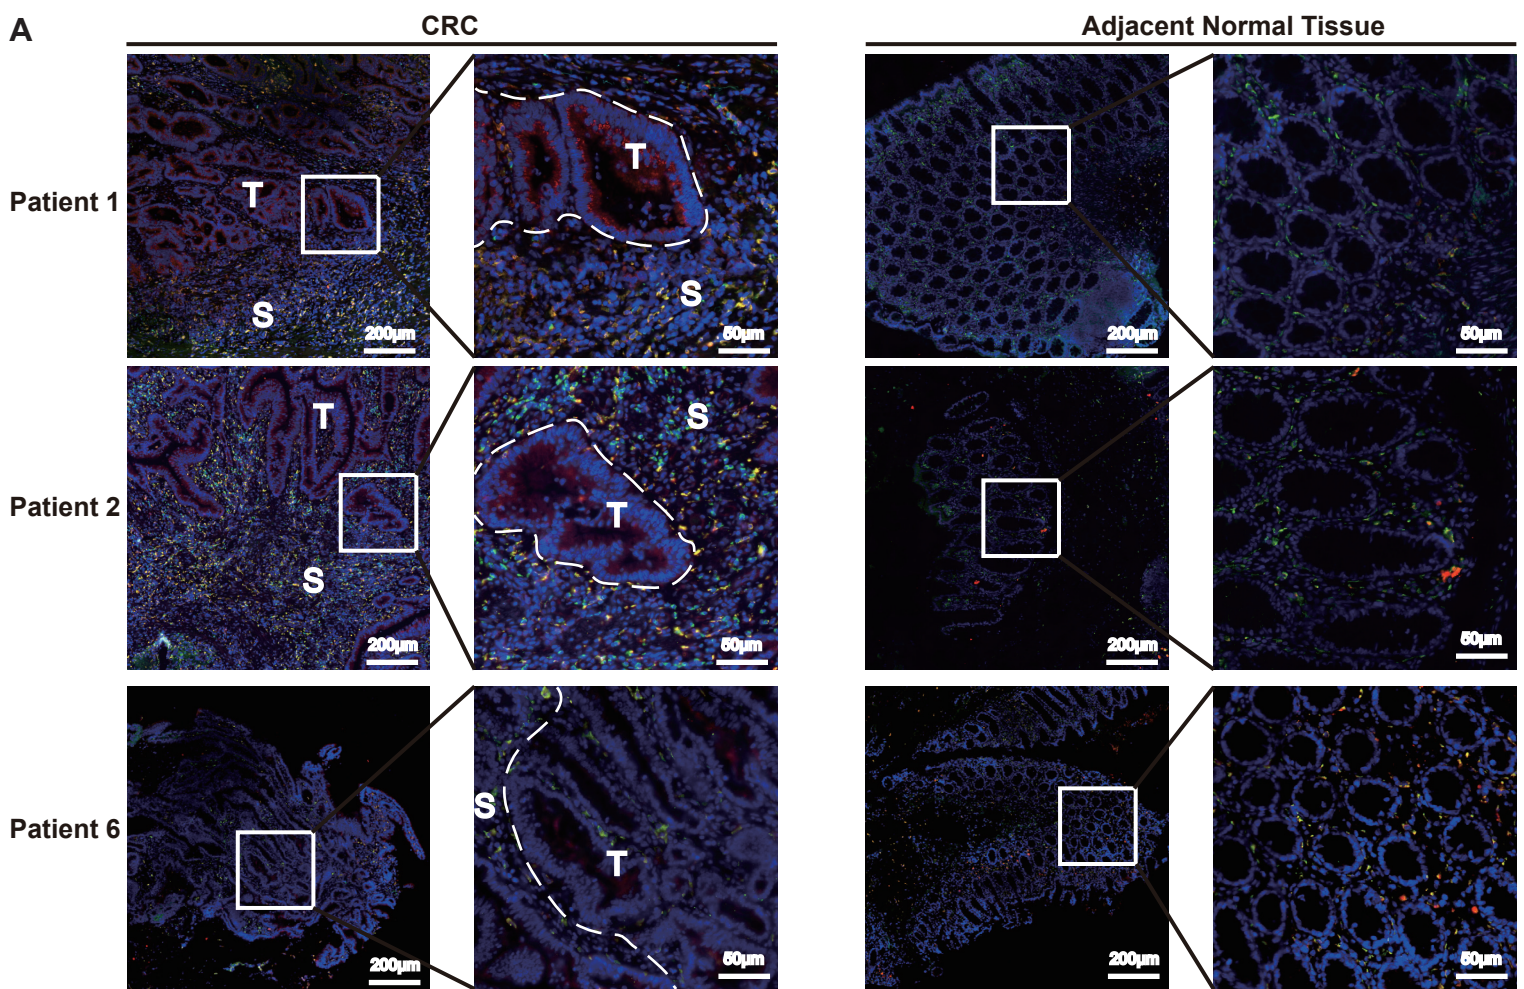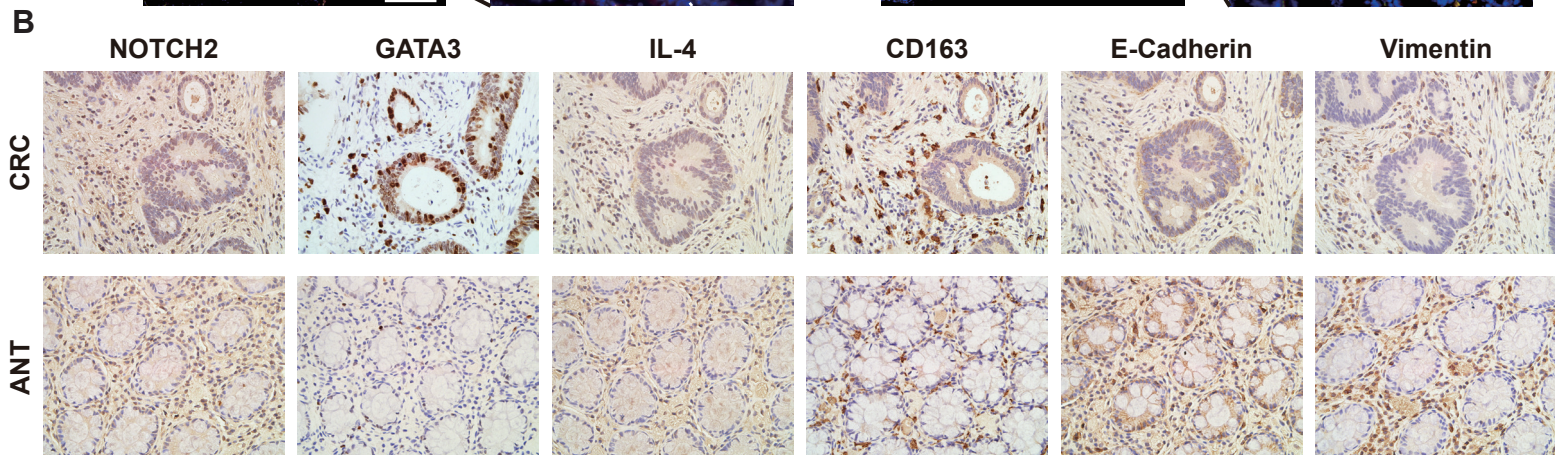

Supplement: MOESM7 [file 16510116]

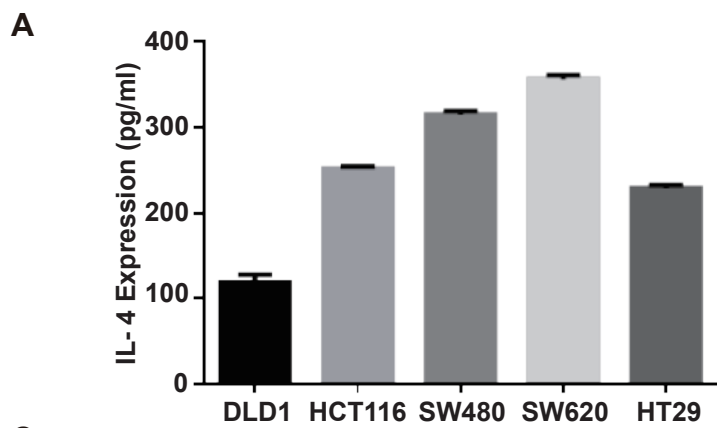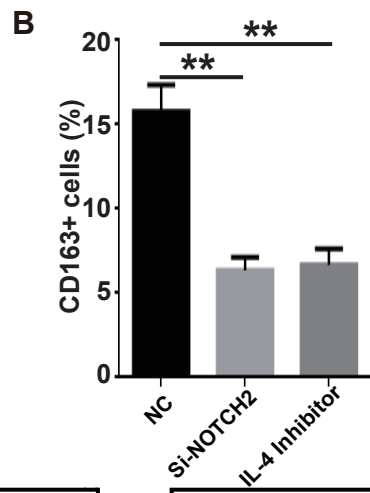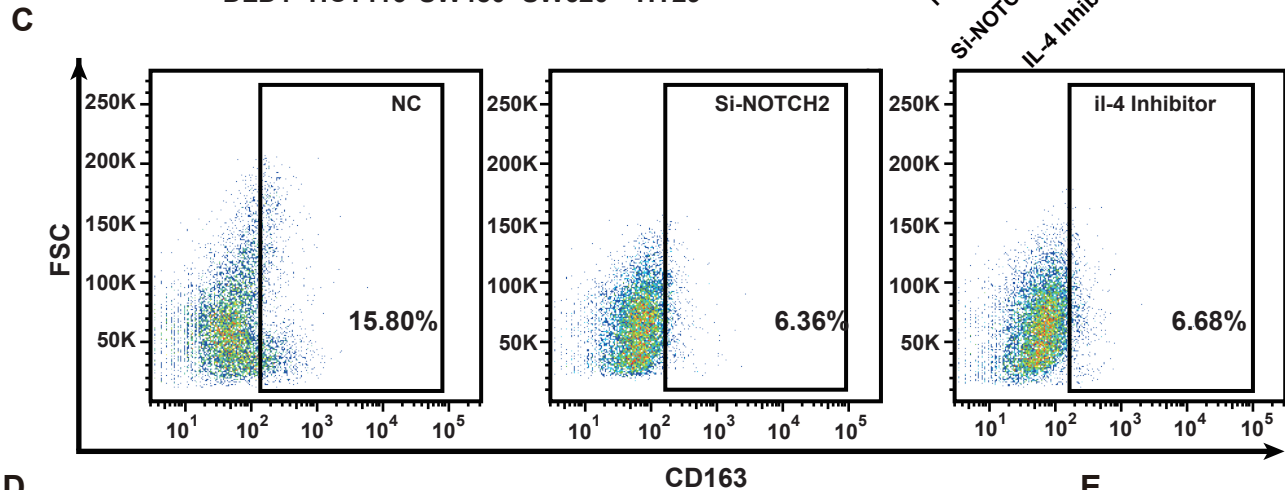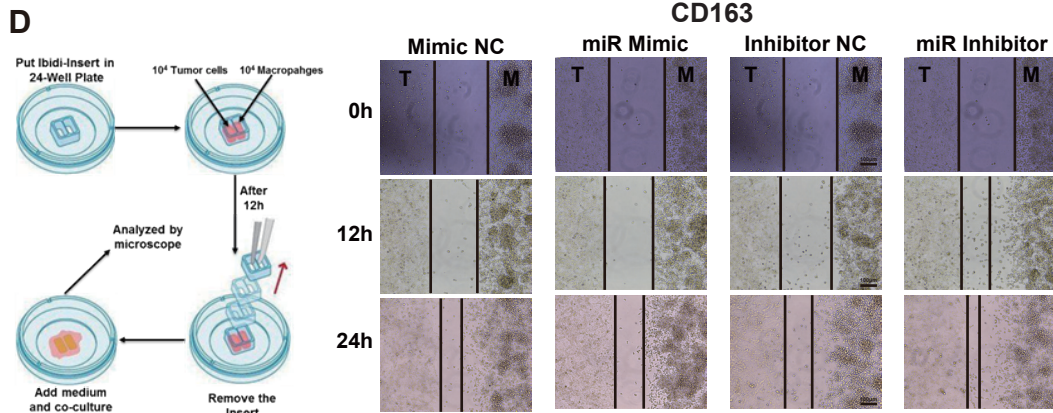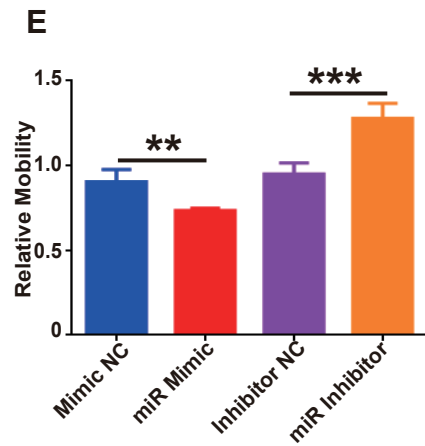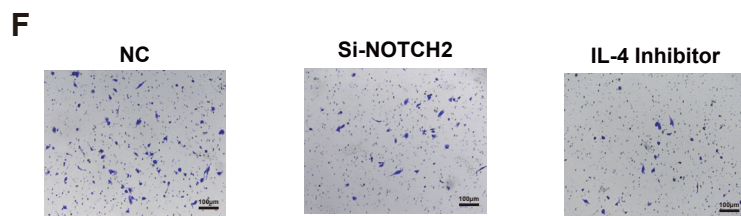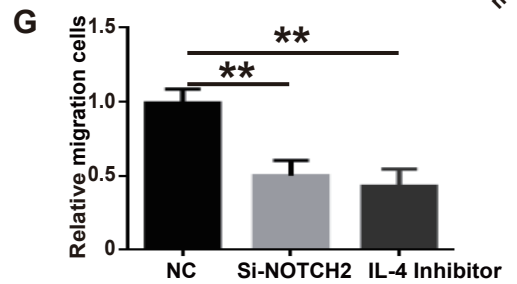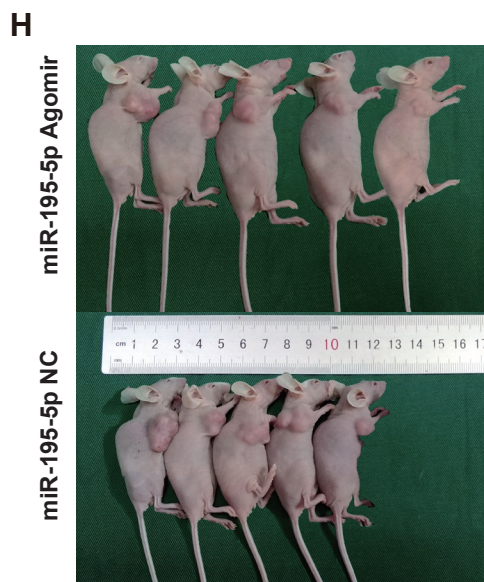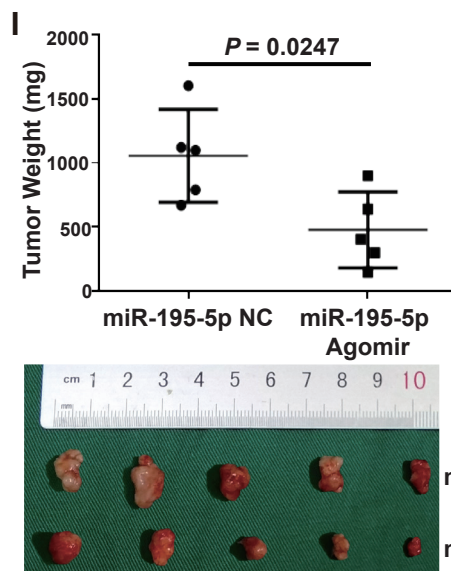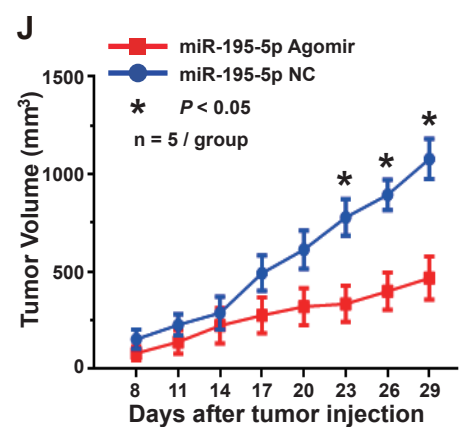

Supplement: MOESM8 [file 16510116]
